## CORRECTION

# Correction: Relationship between Research Outcomes and Risk of Bias, Study Sponsorship, and Author Financial Conflicts of Interest in Reviews of the Effects of Artificially Sweetened Beverages on Weight Outcomes: A Systematic Review of Reviews

Daniele Mandrioli, Cristin E Kearns, Lisa A. Bero

There is a typographical error in the listed ratio of favorable conclusions without conflicts of interest. The text is changed from 4/9 to the correct ratio of 1/9. The following sentences need to be amended, changed number bolded below:

- The final sentence of the “Results” subsection of the Abstract: Reviews performed by authors that had a financial conflict of interest with the food industry (disclosed in the article or not) were more likely to have favorable conclusions (18/22) than reviews performed by authors without conflicts of interest (**1/9**), RR: 7.36 (95% CI: 1.15 to 47.22). Risk of bias was similar and high in most of the reviews.
- The “Relationship between author financial conflict of interest and review conclusions” subsection of the Results: Reviews performed by authors with a conflict of interest with the food industry were more likely to have favorable conclusions (18/22) than reviews performed by authors without conflicts of interest (**1/9**), RR: 7.36 (95% CI: 1.15 to 47.22). Notably, the only reviews performed by authors with conflicts of interest that reported unfavorable conclusions were all funded by competitor industries (4/4).

The authors note that the correct number is shown in Table 3 and was used in their calculations of relative risk.

## Reference

1. Mandrioli D, Kearns CE, Bero LA (2016) Relationship between Research Outcomes and Risk of Bias, Study Sponsorship, and Author Financial Conflicts of Interest in Reviews of the Effects of Artificially Sweetened Beverages on Weight Outcomes: A Systematic Review of Reviews. PLoS ONE 11(9): e0162198. <https://doi.org/10.1371/journal.pone.0162198> PMID: 27606602

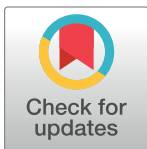

## OPEN ACCESS

**Citation:** Mandrioli D, Kearns CE, Bero LA (2020) Correction: Relationship between Research Outcomes and Risk of Bias, Study Sponsorship, and Author Financial Conflicts of Interest in Reviews of the Effects of Artificially Sweetened Beverages on Weight Outcomes: A Systematic Review of Reviews. PLoS ONE 15(3): e0230469. <https://doi.org/10.1371/journal.pone.0230469>

**Published:** March 10, 2020

**Copyright:** © 2020 Mandrioli et al. This is an open access article distributed under the terms of the [Creative Commons Attribution License](https://creativecommons.org/licenses/by/4.0/), which permits unrestricted use, distribution, and reproduction in any medium, provided the original author and source are credited.
